# Supplementary material for: Efficient and thermally stable organic solar cells based on small molecule donor and polymer acceptor
Source: PubMed Central journal article supplement (PMC6646397; doi:10.1038/s41467-019-10984-6), 2019-07-22
Supplement: 41467_2019_10984_MOESM3_ESM.pdf [file 41467_2019_10984_MOESM3_ESM.pdf]

## Solar Cells Reporting Summary

Nature Research wishes to improve the reproducibility of the work that we publish. This form is intended for publication with all accepted papers reporting the characterization of photovoltaic devices and provides structure for consistency and transparency in reporting. Some list items might not apply to an individual manuscript, but all fields must be completed for clarity.

For further information on Nature Research policies, including our [data availability policy](#), see [Authors & Referees](#).

## ▶ Experimental design

## Please check: are the following details reported in the manuscript?

## 1. Dimensions

- Area of the tested solar cells  Yes Described in Methods, section "OSC devices fabrication and measurement"  
 No
- Method used to determine the device area  Yes Described in Methods, section "OSC devices fabrication and measurement".  
 No

## 2. Current-voltage characterization

- Current density-voltage (J-V) plots in both forward and backward direction  Yes Provided in Supplementary Fig. 17.  
 No
- Voltage scan conditions  Yes Described in Methods, section "OSC devices fabrication and measurement".  
*For instance: scan direction, speed, dwell times*  
 No
- Test environment  Yes Described in Methods, section "OSC devices fabrication and measurement".  
*For instance: characterization temperature, in air or in glove box*  
 No
- Protocol for preconditioning of the device before its characterization  Yes No preconditioning of the device before its characterization.  
 No
- Stability of the J-V characteristic  Yes Provided in Figure 6.  
*Verified with time evolution of the maximum power point or with the photocurrent at maximum power point; see ref. 7 for details.*  
 No

## 3. Hysteresis or any other unusual behaviour

- Description of the unusual behaviour observed during the characterization  Yes No unusual behavior was observed.  
 No
- Related experimental data  Yes No unusual behavior was observed.  
 No

## 4. Efficiency

- External quantum efficiency (EQE) or incident photons to current efficiency (IPCE)  Yes Provided in Figure 3.  
 No
- A comparison between the integrated response under the standard reference spectrum and the response measure under the simulator  Yes Provided in Table 2.  
 No
- For tandem solar cells, the bias illumination and bias voltage used for each subcell  Yes No tandem solar cells are involved in this manuscript.  
 No

## 5. Calibration

- Light source and reference cell or sensor used for the characterization  Yes Described in Methods, section "OSC devices fabrication and measurement".  
 No
- Confirmation that the reference cell was calibrated and certified  Yes Described in Methods, section "OSC devices fabrication and measurement".  
 No

|                                                                                                                                                                                               |                                                                        |                                                                                                                                                                                                        |
|-----------------------------------------------------------------------------------------------------------------------------------------------------------------------------------------------|------------------------------------------------------------------------|--------------------------------------------------------------------------------------------------------------------------------------------------------------------------------------------------------|
| Calculation of spectral mismatch between the reference cell and the devices under test                                                                                                        | <input type="checkbox"/> Yes<br><input checked="" type="checkbox"/> No | Spectral mismatch was not calculated. By calculating the Jsc from EQE based on the solar simulator spectral for the standard silicon cell and our OSC devices, the mismatch factor was close to unity. |
| 6. Mask/aperture                                                                                                                                                                              |                                                                        |                                                                                                                                                                                                        |
| Size of the mask/aperture used during testing                                                                                                                                                 | <input checked="" type="checkbox"/> Yes<br><input type="checkbox"/> No | Described in Methods, section "OSC devices fabrication and measurement".                                                                                                                               |
| Variation of the measured short-circuit current density with the mask/aperture area                                                                                                           | <input checked="" type="checkbox"/> Yes<br><input type="checkbox"/> No | Provided in Supplementary Table 2.                                                                                                                                                                     |
| 7. Performance certification                                                                                                                                                                  |                                                                        |                                                                                                                                                                                                        |
| Identity of the independent certification laboratory that confirmed the photovoltaic performance                                                                                              | <input type="checkbox"/> Yes<br><input checked="" type="checkbox"/> No | Limited by the encapsulation, we have not certified our efficiency values.                                                                                                                             |
| A copy of any certificate(s)<br><i>Provide in Supplementary Information</i>                                                                                                                   | <input type="checkbox"/> Yes<br><input checked="" type="checkbox"/> No | No certification.                                                                                                                                                                                      |
| 8. Statistics                                                                                                                                                                                 |                                                                        |                                                                                                                                                                                                        |
| Number of solar cells tested                                                                                                                                                                  | <input checked="" type="checkbox"/> Yes<br><input type="checkbox"/> No | Provided in Table 2.                                                                                                                                                                                   |
| Statistical analysis of the device performance                                                                                                                                                | <input checked="" type="checkbox"/> Yes<br><input type="checkbox"/> No | Provided in Table 2.                                                                                                                                                                                   |
| 9. Long-term stability analysis                                                                                                                                                               |                                                                        |                                                                                                                                                                                                        |
| Type of analysis, bias conditions and environmental conditions<br><i>For instance: illumination type, temperature, atmosphere humidity, encapsulation method, preconditioning temperature</i> | <input checked="" type="checkbox"/> Yes<br><input type="checkbox"/> No | Described in Methods, section "Thermal and light stability tests".                                                                                                                                     |
